# Supplementary material
Source: Springer Nature journal article supplement (https://www.springermedizin.de/resource/supplementary/13012_2008_253_MOESM1_ESM.pdf/9629562)

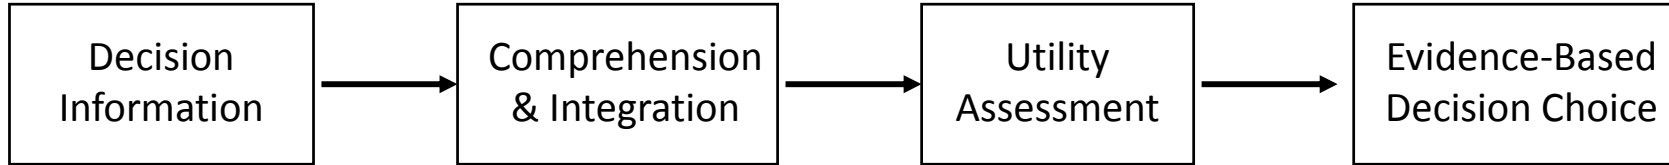

Adapted from Kahneman, & Tversky, (1979)

Supplement: MOESM1 [file 9629562]
